# Supplementary material for: Crystallization mechanism and photocatalytic performance of vanadium-modified bismuth oxide through precipitation processes at room temperature
Source: Royal Society of Chemistry journal article supplement (doi:10.1039/c6ce00954a), 2016-01-01
Supplement: c6ce00954a1.pdf [file c6ce00954a1.pdf]

Electronic Supplementary Information

**Crystallization mechanism and photocatalytic performance of  
vanadium-modified bismuth oxide through precipitation processes at  
room temperature**

Table S1 SEM-EDXS results of A-BV sample

| Time   | A-BV005 | A-BV01 | A-BV02 |
|--------|---------|--------|--------|
| 10 min | 0.014   | 0.045  | 0.082  |
| 1 h    | 0.016   | 0.051  | 0.098  |
| 6 h    | 0.023   | 0.102  | 0.119  |
| 12 h   | 0.048   | 0.105  | 0.116  |
| 24 h   | 0.054   | 0.102  | 0.124  |

Table S2 Elemental analysis of B-BV sample

| Sample | ICP  | SEM-EDXS | TEM-EDXS |
|--------|------|----------|----------|
| B-BV02 | 0.16 | 0.18     | 0.16     |
| B-BV05 | 0.23 | 0.22     | 0.21     |
